# Supplementary figures and images for: Child outcomes after placement of a cervical pessary in women with a multiple pregnancy: A 4‐year follow‐up of the ProTWIN trial
Source: PubMed Central journal article supplement — Acta Obstet Gynecol Scand. 2019 Jun 18;98(10):1292–300. doi: 10.1111/aogs.13630 (PMC6900136; doi:10.1111/aogs.13630), 2019-06-18

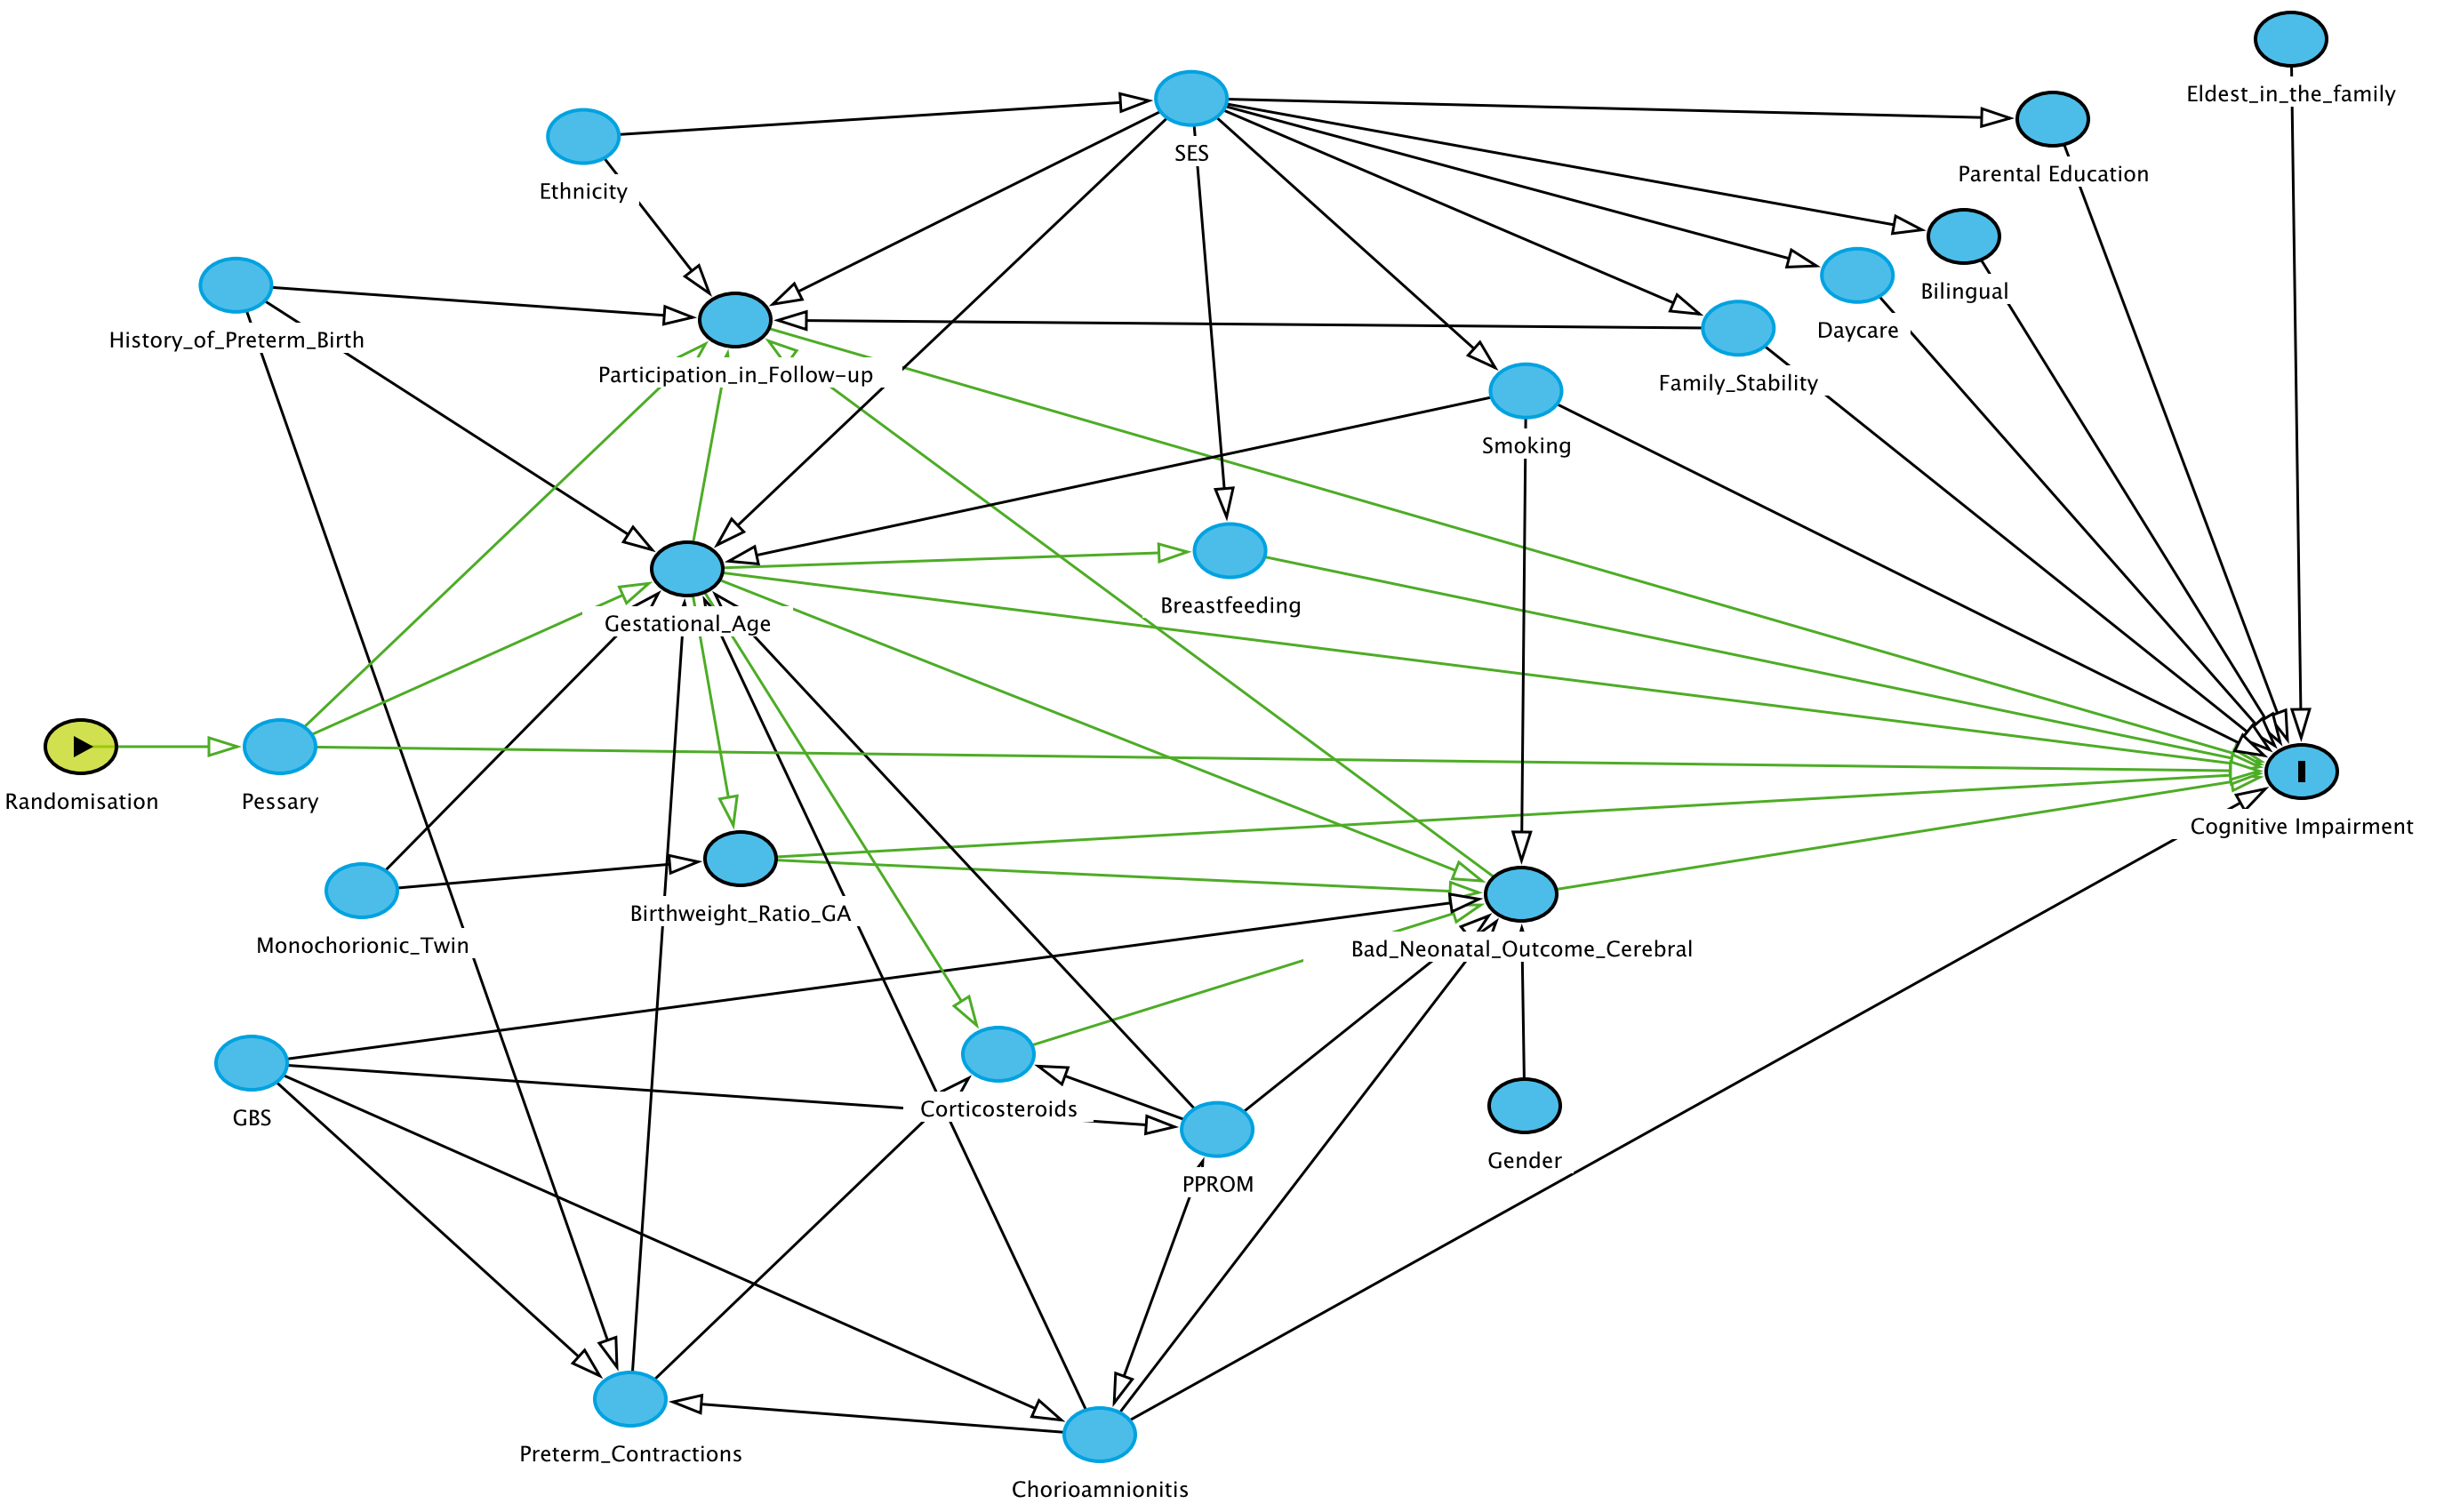

Supplement: AOGS-98-1292-s001.pdf [file AOGS-98-1292-s001.pdf]
